# Supplementary material for: First Account of Phylogeographic Variation, Larval Characters, and Laboratory Rearing of the Endangered Cobblestone Tiger Beetle Cicindelidia marginipennis, Dejean, 1831 with Observations of Their Natural History
Source: Insects. 2020 Oct 16;11(10):708. doi: 10.3390/insects11100708 (PMC7650647; doi:10.3390/insects11100708)
Supplement: Supplementary file 1 [file insects-11-00708-s001.xlsx]

## Sheet: Specimens
Accession number	State	Collector	Locality	Date	Sex	Notes	Lat	Long	MLepF-HCO	LCO-MLepR	LepF-LepR	CytB	GenBank COI	GenBank CYTB
CIC09_078_Cicindela_marginipennis_Canada_New_Brunswick	NB	R. Webster	St. John River, Becaguimec Island	2008-07-26	Female		46.3146	-67.5445	CTTTCCCCCGAATAAATAATATAAGTTTCTGACTTCTACCACCATCACTAACCTTATTATTAATAAGTAGAATAGTAGGAGATGGGGCTGGAACAGGCTGAACTGTTTATCCTCCATTATCAGCTGGAATTGCTCATGCAGGGGCTTCAGTTGATTTAGCAATTTTTAGCTTGCATCTAGCCGGAGTTTCTTCAATTCTCGGTGCAGTAAATTTTATTACTACAATTATTAATATACGATCGGTAGGAATAACATTCGACCGAATGCCTTTATTTGTATGATCAGTCGGTATTACAGCCTTACTATTACTGTTATCACTACCTGTACTAGCAGGTGCAATTACCATGTTACTTACTGATCGTAATCTAAATACATCCTTCTTTGACCCGGCAGGCGGGG…
CIC09_079_Cicindela_marginipennis_Canada_New_Brunswick	NB	R. Webster	St. John River, Becaguimec Island	2008-07-26	Female		46.3146	-67.5445	CTTTCCCCCGAATAAATAATATAAGTTTCTGACTTCTACCACCATCACTAACCTTATTATTAATAAGTAGAATAGTAGGAGATGGGGCTGGAACAGGCTGAACTGTTTATCCTCCATTATCAGCTGGAATTGCTCATGCAGGGGCTTCAGTTGATTTAGCAATTTTTAGCTTGCATCTAGCCGGAGTTTCTTCAATTCTCGGTGCAGTAAATTTTATTACTACAATTATTAATATACGATCGGTAGGAATAACATTCGACCGAATGCCTTTATTTGTATGATCAGTCGGTATTACAGCCTTACTATTACTGTTATCACTACCTGTACTAGCAGGTGCAATTACCATGTTACTTACTGATCGTAATCTAAATACATCCTTCTTTGACCCGGCNGGCGGGG…
CIC09_080_Cicindela_marginipennis_Canada_New_Brunswick	NB	R. Webster	St. John River, Becaguimec Island	2008-07-26	Male		46.3146	-67.5445	CTTTCCCCCGAATAAATAATATAAGTTTCTGACTTCTACCACCATCACTAACCTTATTATTAATAAGTAGAATAGTAGGAGATGGGGCTGGAACAGGCTGAACTGTTTATCCTCCATTATCAGCTGGAATTGCTCATGCAGGGGCTTCAGTTGATTTAGCAATTTTTAGCTTGCATCTAGCCGGAGTTTCTTCAATTCTCGGTGCAGTAAATTTTATTACTACAATTATTAATATACGATCGGTAGGAATAACATTCGACCGAATGCCTTTATTTGTATGATCAGTCGGTATTACAGCCTTACTATTACTGTTATCACTACCTGTACTAGCAGGTGCAATTACCATGTTACTTACTGATCGTAATCTAAATACATCCTTCTTTGACCCGGCAGGCGGGG…
CIC09_081_Cicindela_marginipennis_Canada_New_Brunswick	NB	R. Webster	St. John River, Becaguimec Island	2008-07-26	Male		46.3146	-67.5445	CTTTCCCCCGAATAAATAATATAAGTTTCTGACTTCTACCACCATCACTAACCTTATTATTAATAAGTAGAATAGTAGGAGATGGGGCTGGAACAGGCTGAACTGTTTATCCTCCATTATCAGCTGGAATTGCTCATGCAGGGGCTTCAGTTGATTTAGCAATTTTTAGCTTGCATCTAGCCGGAGTTTCTTCAATTCTCGGTGCAGTAAATTTTATTACTACAATTATTAATATACGATCGGTAGGAATAACATTCGACCGAATGCCTTTATTTGTATGATCAGTCGGTATTACAGCCTTACTATTACTGTTATCACTACCTGTACTAGCAGGTGCAATTACCATGTTACTTACTGATCGTAATCTAAATACATCCTTCTTTGACCCGGCAGGCGGGG…
CIC09_083_Cicindela_marginipennis_Canada_New_Brunswick	NB	R. Webster	St. John River, Becaguimec Island	2008-07-26	Male		46.3146	-67.5445	CTTTCCCCCGAATAAATAATATAAGTTTCTGACTTCTACCACCATCACTAACCTTATTATTAATAAGTAGAATAGTAGGAGATGGGGCTGGAACAGGCTGAACTGTTTATCCTCCATTATCAGCTGGAATTGCTCATGCAGGGGCTTCAGTTGATTTAGCAATTTTTAGCTTGCATCTAGCCGGAGTTTCTTCAATTCTCGGTGCAGTAAATTTTATTACTACAATTATTAATATACGATCGGTAGGAATAACATTCGACCGAATGCCTTTATTTGTATGATCAGTCGGTATTACAGCCTTACTATTACTGTTATCACTACCTGTACTAGCAGGTGCAATTACCATGTTACTTACTGATCGTAATCTAAATACATCCTTCTTTGACCCGGCAGGCGGGG…
CIC09_084_Cicindela_marginipennis_Canada_New_Brunswick	NB	R. Webster	St. John River, Becaguimec Island	2008-07-26	Female		46.3146	-67.5445	CTTTCCCCCGAATAAATAATATAAGTTTCTGACTTCTACCACCATCACTAACCTTATTATTAATAAGTAGAATAGTAGGAGATGGGGCTGGAACAGGCTGAACTGTTTATCCTCCATTATCAGCTGGAATTGCTCATGCAGGGGCTTCAGTTGATTTAGCAATTTTTAGCTTGCATCTAGCCGGAGTTTCTTCAATTCTCGGTGCAGTAAATTTTATTACTACAATTATTAATATACGATCGGTAGGAATAACATTCGACCGAATGCCTTTATTTGTATGATCAGTCGGTATTACAGCCTTACTATTACTGTTATCACTACCTGTACTAGCAGGTACAATTACCATGTTACTTACTGATCGTAATCTAAATACATCCTTCTTTGACCCGGCAGGCGGGG…
CIC09_085_Cicindela_marginipennis_Canada_New_Brunswick	NB	R. Webster	St. John River, Becaguimec Island	2008-07-26	Male		46.3146	-67.5445	CTTTCCCCCGAATAAATAATATAAGTTTCTGACTTCTACCACCATCACTAACCTTATTATTAATAAGTAGAATAGTAGGAGATGGGGCTGGAACAGGCTGAACTGTTTATCCTCCATTATCAGCTGGAATTGCTCATGCAGGGGCTTCAGTTGATTTAGCAATTTTTAGCTTGCATCTAGCCGGAGTTTCTTCAATTCTCGGTGCAGTAAATTTTATTACTACAATTATTAATATACGATCGGTAGGAATAACATTCGACCGAATGCCTTTATTTGTATGATCAGTCGGTATTACAGCCTTACTATTACTGTTATCACTACCTGTACTAGCAGGTGCAATTACCATGTTACTTACTGATCGTAATCTAAATACATCCTTCTTTGACCCGGCAGGCGGGG…
CNC_COLEO_00117384_Cicindela_marginipennis_Canada_New_Brunswick	NB	R.Capozi, R.Webster	Carleton County, Hartland Lower Becaguimec Island						---------------------TAAGTTTCTGACTTCTACCACCATCACTAACCTTATTATTAATAAGTAGAATAGTAGGAGATGGGGCTGGAACAGGCTGAACTGTTTATCCTCCATTATCAGCTGGAATTGCTCATGCAGGGGCTTCAGTTGATTTAGCAATTTTTAGCTTGCATCTAGCCGGAGTTTCTTCAATTCTCGGTGCAGTAAATTTTATTACTACAATTATTAATATACGATCGGTAGGAATAACATTCGACCGAATGCCTTTATTTGTATGATCAGTCGGTATTACAGCCTTACTATTACTGTTATCACTACCTGTACTAGCAGGTGCAATTACCATGTTACTTACTGATCGTAATCTAAATACATCCTTCTTTGACCCGGCAGGCGGGG…
CNC_COLEO_00117566_Cicindela_marginipennis_Canada_New_Brunswick	NB	R.Webster	Carleton County, Saint John River, Becaguimec Isla						CTTTCCCCCGAATAAATAATATAAGTTTCTGACTTCTACCACCATCACTAACCTTATTATTAATAAGTAGAATAGTAGGAGATGGGGCTGGAACAGGCTGAACTGTTTATCCTCCATTATCAGCTGGAATTGCTCATGCAGGGGCTTCAGTTGATTTAGCAATTTTTAGCTTGCATCTAGCCGGAGTTTCTTCAATTCTCGGTGCAGTAAATTTTATTACTACAATTATTAATATACGATCGGTAGGAATAACATTCGACCGAATGCCTTTATTTGTATGATCAGTCGGTATTACAGCCTTACTATTACTGTTATCACTACCTGTACTAGCAGGTGCAATTACCATGTTACTTACTGATCGTAATCTAAATACATCCTTCTTTGACCCGGCAGGCGGGG…
CTB_001	WV	Mack W. Frantz, Ph.D. WVDNR Zoologist	Williamstown Boat ramp	2018					CAGGAAACAGCTATGACTAAACTTCAGGGTGACCAAAAAATCAGAATAGATGTTGATAAAGAATAGGATCCCCCCCGCCTGCCGGGTCAAAGAAGGATGTATTTAGATTACGATCAGTAAGTAACATGGTAATTGCACCTGCTAGTACAGGTAGTGATAACAGTAATAGTAAGGCTGTAATACCGACTGATCATACAAATAAAGGCATTCGGTCGAATGTTATTCCTACCGATCGTATATTAATAATTGTAGTAATAAAATTTACTGCACCGAGAATTGAAGAAACTCCGGCTARATGCAAGCTAAAAATTGCTAAATCAACTGAAGCCCCTGCATGAGCAATTCCRGCTGATAATGGAGGATAAACAGTTCAGCCTGTTCCAGCCCCATCTCCTACTA…				MT904220
CTB_002	VT	R. Gwiazdowski	Windsor	2019-07-21	Female	VT2 Female			TCAGGAAACAGCTATGACTAAACTTCAGGGTGACCAAAAAATCAGAATAGATGTTGATAAAGAATAGGATCCCCCCCGCCTGCCGGGTCAAAGAAGGATGTATTTAGATTACGATCAGTAAGTAACATGGTAATTGCACCTGCTAGTACAGGTAGTGATAACAGTAATAGTAAGGCTGTAATACCGACTGATCATACAAATAAAGGCATTCGGTCGAATGTTATTCCTACCGATCGTATATTAATAATTGTAGTAATAAAATTTACTGCACCGAGAATTGAAGAAACTCCGGCTAGATGCAAGCTAAAAATTGCTAAATCAACTGAAGCCCCTGCATGAGCAATTCCAGCTGATAATGGAGGATAAACAGTTCAGCCTGTTCCAGCCCCATCTCCTACT…	AATCATAAAGATATTGGAACCTTATATTTTATTTTTGGAGCCTGATCAGGAATAGTAGGAACCTCATTAAGTATATTAATTCGAGCAGAATTGGGGAGTCCAGGATCTCTTATTGGAGATGATCAGATTTACAATGTAATTGTAACAGCTCACGCCTTTGTAATAATTTTCTTTATAGTAATGCCTATCATAATTGGAGGATTTGGAAATTGACTAGTACCCTTAATACTGGGAGCTCCAGATATGGCTTTCCCCCGAATAAATAATATAAGTTTCTGACTTCTACCACCATCACTAACCTTATTATTAATAAGTAGAATAGTAG	AATCATAAAGATATTGGAACCTTATATTTTATTTTTGGAGCCTGATCAGGAATAGTAGGAACCTCATTAAGTATATTAATTCGAGCAGAATTGGGGAGTCCAGGATCTCTTATTGGAGATGATCAGATTTACAATGTAATTGTAACAGCTCACGCCTTTGTAATAATTTTCTTTATAGTAATGCCTATCATAATTGGAGGATTTGGAAATTGACTAGTACCCTTAATACTGGGAGCTCCAGATATGGCTTTCCCCCGAATAAATAATATAAGTTTCTGACTTCTACCACCATCACTAACCTTATTATTAATAAGTAGAATAGTAGGAGATGGGGCTGGAACAGGCTGAACTGTTTATCCTCCATTATCAGCTGGAATTGCTCATGCAGGGGCTTCAGTT…	TTTTGAGGAGCAACAGTTATTACAAATCTATTATCCGCCATTCCATATGTAGGTACTATATTAGTCCAATGAGTATGGGGAGGATTTGCTGTAGACAATGCAACCTTAACACGATTCTTTACGTTCCATTTTATTTTACCATTCATTGTAGCCGCAATAGTACTAATCCACCTTCTATTCCTTCACCAAACTGGATCAAATAATCCACTAGGAATAAATAGCAATATTGATAAAATTCCTTTCCACCCATACTTCACATTTAAGGATATTATAGGATTTATCATTTTAATAATAACACTAACACTATTAACACTACTAAACCCATACTATTTAGGTGATCCCGATAATTTTACTCCGGCTAACCCCCTAGTAACCCCAGTTCACATTCAACCCGAATGA…	MT904221	MT904263
CTB_004	VT	R. Gwiazdowski	Windsor	2019-07-21	Male	VT3 male
CTB_005	VT	R. Gwiazdowski	Windsor	2019-07-21	Male	VT2 male			TCAGGAAACAGCTATGACTAAACTTCAGGGTGACCAAAAAATCAGAATAGATGTTGATAAAGAATAGGATCCCCCCCGCCTGCCGGGTCAAAGAAGGATGTATTTAGATTACGATCAGTAAGTAACATGGTAATTGCACCTGCTAGTACAGGTAGTGATAACAGTAATAGTAAGGCTGTAATACCGACTGATCATACAAATAAAGGCATTCGGTCGAATGTTATTCCTACCGATCGTATATTAATAATTGTAGTAATAAAATTTACTGCACCGAGAATTGAAGAAACTCCGGCTAGATGCAAGCTAAAAATTGCTAAATCAACTGAAGCCCCTGCATGAGCAATTCCAGCTGATAATGGAGGATAAACAGTTCAGCCTGTTCCAGCCCCATCTCCTACT…		AATCATAAAGATATTGGAACCTTATATTTTATTTTTGGAGCCTGATCAGGAATAGTAGGAACCTCATTAAGTATATTAATTCGAGCAGAATTGGGGAGTCCAGGATCTCTTATTGGAGATGATCAGATTTACAATGTAATTGTAACAGCTCACGCCTTTGTAATAATTTTCTTTATAGTAATGCCTATCATAATTGGAGGATTTGGAAATTGACTAGTACCCTTAATACTGGGAGCTCCAGATATGGCTTTCCCCCGAATAAATAATATAAGTTTCTGACTTCTACCACCATCACTAACCTTATTATTAATAAGTAGAATAGTAGGAGATGGGGCTGGAACAGGCTGAACTGTTTATCCTCCATTATCAGCTGGAATTGCTCATGCAGGGGCTTCAGTT…		MT904222
CTB_006	VT	R. Gwiazdowski	Windsor	2019-07-21	Female	VT2 Female
CTB_008	NH	R. Gwiazdowski	Chase Island, Cornish	2019-07-21	Female	NH3 Female			TAAACTTCAGGGTGACCAAAAAATCAGAATAGATGTTGATAAAGAATAGGATCCCCCCCGCCTGCCGGGTCAAAGAAGGATGTATTTAGATTACGATCAGTAAGTAACATGGTAATTGCACCTGCTAGTACAGGTAGTGATAACAGTAATAGTAAGGCTGTAATACCGACTGATCATACAAATAAAGGCATTCGGTCGAATGTTATTCCTACCGATCGTATATTAATAATTGTAGTAATAAAATTTACTGCACCGAGAATTGAAGAAACTCCGGCTAGATGCAAGCTAAAAATTGCTAAATCAACTGAAGCCCCTGCATGAGCAATTCCAGCTGATAATGGAGGATAAACAGTTCAGCCTGTTCCAGCCCCATCTCCTACTATTCTACTTATTAATAAT…		TATTCAACCCAATCATAAAGATATTGGAACCTTATATTTTATTTTTGGAGCCTGATCAGGAATAGTAGGAACCTCATTAAGTATATTAATTCGAGCAGAATTGGGGAGTCCAGGATCTCTTATTGGAGATGATCAGATTTACAATGTAATTGTAACAGCTCACGCCTTTGTAATAATTTTCTTTATAGTAATGCCTATCATAATTGGAGGATTTGGAAATTGACTAGTACCCTTAATACTGGGAGCTCCAGATATGGCTTTCCCCCGAATAAATAATATAAGTTTCTGACTTCTACCACCATCACTAACCTTATTATTAATAAGTAGAATAGTAGGAGATGGGGCTGGAACAGGCTGAACTGTTTATCCTCCATTATCAGCTGGAATTGCTCATGCAGG…		MT904223
CTB_009	NH	R. Gwiazdowski	Chase Island, Cornish	2019-07-21	Female				TCAGGAAACAGCTATGACTAAACTTCAGGGTGACCAAAAAATCAGAATAGATGTTGATAAAGAATAGGATCCCCCCCGCCTGCCGGGTCAAAGAAGGATGTATTTAGATTACGATCAGTAAGTAACATGGTAATTGCACCTGCTAGTACAGGTAGTGATAACAGTAATAGTAAGGCTGTAATACCGACTGATCATACAAATAAAGGCATTCGGTCGAATGTTATTCCTACCGATCGTATATTAATAATTGTAGTAATAAAATTTACTGCACCGAGAATTGAAGAAACTCCGGCTAGATGCAAGCTAAAAATTGCTAAATCAACTGAAGCCCCTGCATGAGCAATTCCAGCTGATAATGGAGGATAAACAGTTCAGCCTGTTCCAGCCCCATCTCCTACT…				MT904224
CTB_010	NH	R. Gwiazdowski	Chase Island, Cornish	2019-07-21	Male				TCAGGAAACAGCTATGACTAAACTTCAGGGTGACCAAAAAATCAGAATAGATGTTGATAAAGAATAGGATCCCCCCCGCCTGCCGGGTCAAAGAAGGATGTATTTAGATTACGATCAGTAAGTAACATGGTAATTGCACCTGCTAGTACAGGTAGTGATAACAGTAATAGTAAGGCTGTAATACCGACTGATCATACAAATAAAGGCATTCGGTCGAATGTTATTCCTACCGATCGTATATTAATAATTGTAGTAATAAAATTTACTGCACCGAGAATTGAAGAAACTCCGGCTAGATGCAAGCTAAAAATTGCTAAATCAACTGAAGCCCCTGCATGAGCAATTCCAGCTGATAATGGAGGATAAACAGTTCAGCCTGTTCCAGCCCCATCTCCTACT…	AAACGACGGCCAGTGGTCAACAAATCATAAAGATATTGGTACTTTATATTTCATTTTTGGAGCTTGAGCTGGAATAGTAGGTACTTCACTAAGAATTTTAATTCGAGCAGAATTAGGTCATCCTGGAGCCTTAATTGGGGATGACCAAATTTATAATGTAATTGTGACTGCTCATGCATTTATTATAATTTTTTTTATAGTTATACCTATTATAATAGGAGGATTTGGAAATTGATTAGTTCCTTTAATATTAGGGGCACCTGATATAGCTTTCCCACGAATAAATAATATAAGTTTTTGATTATTACCTCCTTCTCTTACACTATTATTGGTAAGTAGAATGGTTGAAAATGGAGCTGGAACAGGA			MT904225
CTB_013	NY	Paul Novak	Livingston Co., Portageville	July 25 2019	Female				TAAACTTCAGGGTGACCAAAAAATCAGAATAGATGTTGATAAAGAATAGGATCCCCCCCGCCTGCCGGGTCAAAGAAGGATGTATTTAGATTACGATCAGTAAGTAACATGGTAATTGCACCTGCTAGTACAGGTAGTGATAACAGTAATAGTAAGGCTGTAATACCGACTGATCATACAAATAAAGGCATTCGGTCGAATGTTATTCCTACCGATCGTATATTAATAATTGTAGTAATAAAATTTACTGCACCGAGAATTGAAGAAACTCCGGCTAGATGCAAGCTAAAAATTGCTAAATCAACTGAAGCCCCTGCATGAGCAATTCCAGCTGATAATGGAGGATAAACAGTTCAGCCTGTTCCAGCCCCATCTCCTACTATTCTACTTATTAATAAT…		ATTCAACCCAATCATAAAGATATTGGAACCTTATATTTTATTTTTGGAGCCTGATCAGGAATAGTAGGAACCTCATTAAGTATATTAATTCGAGCAGAATTGGGGAGTCCAGGATCTCTTATTGGAGATGATCAGATTTACAATGTAATTGTAACAGCTCACGCCTTTGTAATAATTTTCTTTATAGTAATGCCTATCATAATTGGAGGATTTGGAAATTGACTAGTACCCTTAATACTGGGAGCTCCAGATATGGCTTTTCCCCGAATAAATAATATAAGTTTCTGACTTCTACCACCATCACTAACCTTATTATTAATAAGTAGAATAGTAGGAGATGGGGCTGGAACAGGCTGAACTGTTTATCCTCCATTATCAGCTGGAATTGCTCATGCAGGG…	GAGGACAAATATCGTTTTGAGGAGCAACAGTTATTACAAATCTATTATCCGCCATTCCATATGTAGGTACTATATTAGTCCAATGAGTATGGGGAGGATTTGCTGTAGACAATGCAACCTTAACACGATTCTTTACGTTCCATTTTATTTTACCATTCATTGTAGCCGCAATAGTACTAGTCCACCTTCTATTCCTTCACCAAACTGGATCAAATAATCCACTAGGAATAAATAGCAATATTGATAAAATTCCTTTCCACCCATACTTCACATTTAAGGATATTATAGGATTTATCATTTTAATAATAACACTAACACTATTAACACTACTAAACCCATACTATTTAGGTGATCCCGATAATTTTACTCCGGCTAACCCCCTAGTAACCCCAGTTCACA…	MT904226	MT904271
CTB_014	NY	Paul Novak	Livingston Co., Portageville	July 25 2019	Female				TCAGGAAACAGCTATGACTAAACTTCAGGGTGACCAAAAAATCAGAATAGATGTTGATAAAGAATAGGATCCCCCCCGCCTGCCGGGTCAAAGAAGGATGTATTTAGATTACGATCAGTAAGTAACATGGTAATTGCACCTGCTAGTACAGGTAGTGATAACAGTAATAGTAAGGCTGTAATACCGACTGATCATACAAATAAAGGCATTCGGTCGAATGTTATTCCTACCGATCGTATATTAATAATTGTAGTAATAAAATTTACTGCACCGAGAATTGAAGAAACTCCGGCTAGATGCAAGCTAAAAATTGCTAAATCAACTGAAGCCCCTGCATGAGCAATTCCAGCTGATAATGGAGGATAAACAGTTCAGCCTGTTCCAGCCCCATCTCCTACT…				MT904227
CTB_015	NY	Paul Novak	Cattaraugus County, Cattaraugus creek, west of north Oho(?) Road.	July 27 2019	Female				TAAACTTCAGGGTGACCAAAAAATCAGAATAGATGTTGATAAGAATAGGATCCCCCCCGCCTGCCGGGTCAAAGAAGGATGTATTTAGATTACGATCAGTAAGTAACATGGTAATTGCACCTGCTAGTACAGGTAGTGATAACAGTAATAGTAAGGCTGTAATACCGACTGATCATACAAATAAAGGCATTCGGTCGAATGTTATTCCTACCGATCGTATATTAATAATTGTAGTAATAAAATTTACTGCACCGAGAATTGAAGAAACTCCGGCTAGATGCAAGCTAAAAATTGCTAAATCAACTGAAGCCCCTGCATGAGCAATTCCAGCTGATAATGGAGGATAAACAGTTCAGCCTGTTCCAGCCCCRTCTCCTACTATTCTACTTATTAATAATA…		TATATTAATTCGAGCAGAATTGGGGAGTCCAGGATCTCTTATTGGAGATGATCAGATTTACAATGTAATTGTAACAGCTCACGCCTTTGTAATAATTTTCTTTATAGTAATGCCTATCATAATTGGAGGATTTGGAAATTGACTAGTACCCTTAATACTGGGAGCTCCAGATATGGCTTTTCCCCGAATAAATAATATAAGTTTCTGACTTCTACCACCATCACTAACCTTATTATTAATAAGTAGAATAGTAGGAGAYGGGGCTGGAACAGGCTGAACTGTTTATCCTCCATTATCAGCTGGAATTGCTCATGCAGGGGCTTCAGTTGATTTAGCAATTTTTAGCTTGCATCTAGCCGGAGTTTCTTCAATTCTCGGTGCAGTAAATTTTATTACTAC…	GGACAAATATCGTTTTGAGGAGCAACAGTTATTACAAATCTATTATCCGCCATTCCATATGTAGGTACTATATTAGTCCAATGAGTATGGGGAGGATTTGCTGTAGACAATGCAACCTTAACACGATTCTTTACGTTCCATTTTATTTTACCATTCATTGTAGCCGCAATAGTACTAGTCCACCTTCTATTCCTTCACCAAACTGGATCAAATAATCCACTAGGAATAAATAGCAATATTGATAAAATTCCTTTCCACCCATACTTCACATTTAAGGATATTATAGGATTTATCATTTTAATAATAACACTAACACTATTAACACTACTAAACCCATACTATTTAGGTGATCCCGATAATTTTACTCCGGCTAACCCCCTAGTAACCCCAGTTCACATT…	MT904228	MT904270
CTB_016	NY	Paul Novak	Cattaraugus County, Cattaraugus creek, west of north Oho(?) Road.	July 27 2019	Female				CTAAACTTCAGGGTGACCAAAAAATCAGAATAGATGTTGATAAAGAATAGGATCCCCCCCGCCTGCCGGGTCAAAGAAGGATGTATTTAGATTACGATCAGTAAGTAACATGGTAATTGCACCTGCTAGTACAGGTAGTGATAACAGTAATAGTAAGGCTGTAATACCGACTGATCATACAAATAAAGGCATTCGGTCGAATGTTATTCCTACCGATCGTATATTAATAATTGTAGTAATAAAATTTACTGCACCGAGAATTGAAGAAACTCCGGCTAGATGCAAGCTAAAAATTGCTAAATCAACTGAAGCCCCTGCATGAGCAATTCCAGCTGATAATGGAGGATAAACAGTTCAGCCTGTTCCAGCCCCATCTCCTACTATTCTACTTATTAATAA…		TTATATTTTATTTTTGGAGCCTGATCAGGAATAGTAGGAACCTCATTAAGTATATTAATTCGAGCAGAATTGGGGAGTCCAGGATCTCTTATTGGAGATGATCAGATTTACAATGTAATTGTAACAGCTCACGCCTTTGTAATAATTTTCTTTATAGTAATGCCTATCATAATTGGAGGATTTGGAAATTGACTAGTACCCTTAATACTGGGAGCTCCAGATATGGCTTTTCCCCGAATAAATAATATAAGTTTCTGACTTCTACCACCATCACTAACCTTATTATTAATAAGTAGAATAGTAGGAGATGGGGCTGGAACAGGCTGAACTGTTTATCCTCCATTATCAGCTGGAATTGCTCATGCAGGGGCTTCAGTTGATTTAGCAATTTTTAGCTTG…	GACAAATATCGTTTTGAGGAGCAACAGTTATTACAAATCTATTATCCGCCATTCCATATGTAGGTACTATATTAGTCCAATGAGTATGGGGAGGATTTGCTGTAGACAATGCAACCTTAACACGATTCTTTACGTTCCATTTTATTTTACCATTCATTGTAGCCGCAATAGTACTAGTCCACCTTCTATTCCTTCACCAAACTGGATCAAATAATCCACTAGGAATAAATAGCAATATTGATAAAATTCCTTTCCACCCATACTTCACATTTAAGGATATTATAGGATTTATCATTTTAATAATAACACTAACACTATTAACACTACTAAACCCATACTATTTAGGTGATCCCGATAATTTTACTCCGGCTAACCCCCTAGTAACCCCAGTTCACATTC…	MT904229	MT904272
CTB_017	WV	Mack W. Frantz, Ph.D. WVDNR Zoologist	Williamstown Boat ramp	July 18 2019	Female		39.407	-81.4509	TAAACTTCAGGGTGACCAAAAAATCAGAATAGATGTTGATAAAGAATAGGATCCCCCCCGCCTGCCGGGTCAAAGAAGGATGTATTTAGATTACGATCAGTAAGTAACATGGTAATTGCACCTGCTAGTACAGGTAGTGATAACAGTAATAGTAAGGCTGTAATACCGACTGATCATACAAATAAAGGCATTCGGTCGAATGTTATTCCTACCGATCGTATATTAATAATTGTAGTAATAAAATTTACTGCACCGAGAATTGAAGAAACTCCGGCTAGATGCAAGCTAAAAATTGCTAAATCAACTGAAGCCCCTGCATGAGCAATTCCAGCTGATAATGGAGGATAAACAGTTCAGCCTGTTCCAGCCCCATCTCCTACTATTCTACTTATTAATAAT…		ATTCAACCCAATCATAAAGATATTGGAACCTTATATTTTATTTTTGGAGCCTGATCAGGAATAGTAGGAACCTCATTAAGTATATTAATTCGAGCAGAATTGGGGAGTCCAGGATCTCTTATTGGAGATGATCAGATTTACAATGTAATTGTAACAGCTCACGCCTTTGTAATAATTTTCTTTATAGTAATGCCTATCATAATTGGAGGATTTGGAAATTGACTAGTACCCTTAATACTGGGAGCTCCAGATATGGCTTTCCCCCGAATAAATAATATAAGTTTCTGACTTCTACCACCATCACTAACCTTATTATTAATAAGTAGAATAGTAGGAGATGGGGCTGGAACAGGCTGAACTGTTTATCCTCCATTATCAGCTGGAATTGCTCATGCAGGG…	ATGAGGACAAATATCGTTTTGAGGAGCAACAGTTATTACAAATCTATTATCCGCCATTCCATATGTAGGTACTATATTAGTCCAATGAGTATGGGGAGGATTTGCTGTAGACAATGCAACCTTAACACGATTCTTTACGTTCCATTTTATTTTACCATTCATTGTAGCCGCAATAGTACTAGTCCACCTTTTATTCCTTCACCAAACTGGATCAAATAATCCACTAGGAATAAATAGCAATATTGATAAAATTCCTTTCCACCCATACTTCACATTTAAGGATATTATAGGATTTATCATTTTAATAATAACACTAACACTATTAACACTACTAAACCCATACTATTTAGGTGATCCCGATAATTTTACTCCGGCTAACCCCCTAGTAACCCCAGTTCA…	MT904230	MT904268
CTB_018	WV	Mack W. Frantz, Ph.D. WVDNR Zoologist	Williamstown Boat ramp	July 18 2019	Male		39.407	-81.4509	CAGGAAACAGCTATGACTAAACTTCAGGGTGACCAAAAAATCAGAATAGATGTTGATAAAGAATAGGATCCCCCCCGCCTGCCGGGTCAAAGAAGGATGTATTTAGATTACGATCAGTAAGTAACATGGTAATTGCACCTGCTAGTACAGGTAGTGATAACAGTAATAGTAAGGCTGTAATACCGACTGATCATACAAATAAAGGCATTCGGTCGAATGTTATTCCTACCGATCGTATATTAATAATTGTAGTAATAAAATTTACTGCACCGAGAATTGAAGAAACTCCGGCTAGATGCAAGCTAAAAATTGCTAAATCAACTGAAGCCCCTGCATGAGCAATTCCAGCTGATAGTGGAGGATAAACAGTTCAGCCTGTTCCAGCCCCATCTCCTACTA…		CCTTATATTTTATTTTTGGAGCCTGATCAGGAATAGTAGGAACCTCATTAAGTATATTAATTCGAGCAGAATTGGGGAGTCCAGGATCTCTTATTGGAGATGATCAGATTTACAATGTAATTGTAACAGCTCACGCCTTTGTAATAATTTTCTTTATAGTAATGCCTATCATAATTGGAGGATTTGGAAATTGACTAGTACCCTTAATACTGGGAGCTCCAGATATGGCTTTCCCCCGAATAAATAATATAAGTTTCTGACTTCTACCACCATCACTAACTTTATTATTAATAAGTAGAATAGTAGGAGATGGGGCTGGAACAGGCTGAACTGTTTATCCTCCACTATCAGCTGGAATTGCTCATGCAGGGGCTTCAGTTGATTTAGCAATTTTTAGCT…	TTTTGAGGAGCAACAGTTATTACAAATCTATTATCCGCCATTCCATATGTAGGTACTATATTAGTCCAATGAGTATGGGGAGGATTTGCTGTAGACAATGCAACCTTAACACGATTCTTTACGTTCCATTTTATTTTACCATTCATTGTAGCCGCAATAGTACTAATCCACCTTCTATTCCTTCACCAAACTGGATCAAATAATCCACTAGGAATAAATAGCAATATTGATAAAATTCCTTTCCACCCATACTTCACATTTAAGGATATTATAGGATTTATCATTTTAATAATAACACTAACACTATTAACACTACTAAACCCATACTATTTAGGTGATCCCGATAATTTTACTCCGGCTAACCCCCTAGTAACCCCAGTTCACATTCAACCCGAATGA…	MT904231	MT904264
CTB_019	WV	Mack W. Frantz, Ph.D. WVDNR Zoologist	Williamstown Boat ramp	July 18 2019	Male		39.407	-81.4509	CTAAACTTCAGGGTGACCAAAAAATCAGAATAGATGTTGATAAAGAATAGGATCCCCCCCGCCTGCCGGGTCAAAGAAGGATGTATTTAGATTACGATCAGTAAGTAACATGGTAATTGCACCTGCTAGTACAGGTAGTGATAACAGTAATAGTAAGGCTGTAATACCGACTGATCATACAAATAAAGGCATTCGGTCGAATGTTATTCCTACCGATCGTATATTAATAATTGTAGTAATAAAATTTACTGCACCGAGAATTGAAGAAACTCCGGCTAGATGCAAGCTAAAAATTGCTAAATCAACTGAAGCCCCTGCATGAGCAATTCCAGCTGATAGTGGAGGATAAACAGTTCAGCCTGTTCCAGCCCCATCTCCTACTATTCTACTTATTAATAA…		TTATATTTTATTTTTGGAGCCTGATCAGGAATAGTAGGAACCTCATTAAGTATATTAATTCGAGCAGAATTGGGGAGTCCAGGATCTCTTATTGGAGATGATCAGATTTACAATGTAATTGTAACAGCTCACGCCTTTGTAATAATTTTCTTTATAGTAATGCCTATCATAATTGGAGGATTTGGAAATTGACTAGTACCCTTAATACTGGGAGCTCCAGATATGGCTTTCCCCCGAATAAATAATATAAGTTTCTGACTTCTACCACCATCACTAACTTTATTATTAATAAGTAGAATAGTAGGAGATGGGGCTGGAACAGGCTGAACTGTTTATCCTCCACTATCAGCTGGAATTGCTCATGCAGGGGCTTCAGTTGATTTAGCAATTTTTAGCTTG…	ATCTATTATCCGCCATTCCATATGTAGGTACTATATTAGTCCAATGAGTATGGGGAGGATTTGCTGTAGACAATGCAACCTTAACACGATTCTTTACGTTCCATTTTATTTTACCATTCATTGTAGCCGCAATAGTACTAATCCACCTTCTATTCCTTCACCAAACTGGATCAAATAATCCACTAGGAATAAATAGCAATATTGATAAAATTCCTTTCCACCCATACTTCACATTTAAGGATATTATAGGATTTATCATTTTAATAATAACACTAACACTATTAACACTACTAAACCCATACTATTTAGGTGATCCCGATAATTTTACTCCGGCTAACCCCCTAGTAACCCCAGTTCACATTCAACCCGAATGATACTTTCTATTTGCTTACGCAATTC…	MT904232	MT904267
CTB_020	WV	Mack W. Frantz, Ph.D. WVDNR Zoologist	Williamstown Boat ramp	July 18 2019	Female		39.407	-81.4509	GACTAAACTTCAGGGTGACCAAAAAATCAGAATAGATGTTGATAAAGAATAGGATCCCCCCCGCCTGCCGGGTCAAAGAAGGATGTATTTAGATTACGATCAGTAAGTAACATGGTAATTGCACCTGCTAGTACAGGTAGTGATAACAGTAATAGTAAGGCTGTAATACCGACTGATCATACAAATAAAGGCATTCGGTCGAATGTTATTCCTACCGATCGTATATTAATAATTGTAGTAATAAAATTTACTGCACCGAGAATTGAAGAAACTCCGGCTAGATGCAAGCTAAAAATTGCTAAATCAACTGAAGCCCCTGCATGAGCAATTCCAGCTGATAATGGAGGATAAACAGTTCAGCCTGTTCCAGCCCCATCTCCTACTATTCTACTTATTAAT…		AATCATAAAGATATTGGAACCTTATATTTTATTTTTGGAGCCTGATCAGGAATAGTAGGAACCTCATTAAGTATATTAATTCGAGCAGAATTGGGGAGTCCAGGATCTCTTATTGGAGATGATCAGATTTACAATGTAATTGTAACAGCTCACGCCTTTGTAATAATTTTCTTTATAGTAATGCCTATCATAATTGGAGGATTTGGAAATTGACTAGTACCCTTAATACTGGGAGCTCCAGATATGGCTTTCCCCCGAATAAATAATATAAGTTTCTGACTTCTACCACCATCACTAACCTTATTATTAATAAGTAGAATAGTAGGAGATGGGGCTGGAACAGGCTGAACTGTTTATCCTCCATTATCAGCTGGAATTGCTCATGCAGGGGCTTCAGTT…	CCATGAGGACAAATATCGTTTTGAGGAGCAACAGTTATTACAAATCTATTATCCGCCATTCCATATGTAGGTACTATATTAGTCCAATGAGTATGGGGAGGATTTGCAGTAGACAATGCAACCTTAACACGATTCTTTACGTTCCATTTTATTTTACCATTCATTGTAGCCGCAATAGTACTAGTCCACCTTCTATTCCTTCACCAAACTGGATCAAATAATCCACTAGGAATAAATAGCAATATTGATAAAATTCCTTTCCACCCATACTTCACATTTAAGGATATTATAGGATTTATCATTTTAATAATAACACTAACACTATTAACACTACTAAACCCATACTATTTAGGTGATCCCGATAATTTTACTCCGGCTAACCCCCTAGTAACCCCAGTT…	MT904233	MT904269
CTB_021	AL	Brian D. Holt, and Evan Lawrence	Dallas, Co., Alabama Island, Gardiner Island	2019-07-01	Female		32.4348	-86.8559	TCAGGAAACAGCTATGACTAAACTTCAGGGTGACCAAAAAATCAGAATAGATGTTGATAAAGAATAGGATCCCCCCCGCCTGCCGGGTCAAAGAAGGATGTATTTAGATTACGATCAGTAAGTAACATGGTAATTGCACCTGCTAGTACAGGTAGTGATAAYAGTAATAGTAAGGCTGTAATACCGACTGATCATACAAATAAAGGCATTCGGTCGAATGTTATTCCTACCGATCGTATATTAATAATTGTAGTAATAAAATTTACTGCACCGAGAATTGAAGAAACTCCGGCTAGATGCAAGCTAAAAATTGTTAAATCAACTGAAGCCCCTGCATGAGCAATTCCAGCTGATAATGGAGGATAAACAGTTCAGCCTGTTCCAGCCCCATCTCCTACT…		GGACCTCATTAAGTATACTAATTCGAGCAGAATTGGGGAGTCCAGGATCTCTTATTGGAGATGATCAGATTTACAATGTAATTGTAACAGCTCACGCCTTTGTAATAATTTTCTTTATAGTAATGCCTATCATAATTGGAGGATTTGGAAATTGACTAGTACCCTTAATACTGGGAGCTCCAGATATGGCTTTCCCCCGAATAAATAATATAAGTTTCTGACTTCTACCACCATCATTAACTTTATTATTAATAAGTAGAATAGTAGGAGATGGGGCTGGAACAGGCTGAACTGTTTATCCTCCATTATCAGCTGGAATTGCTCATGCAGGGGCTTCAGTTGATTTAACAATTTTTAGCTTGCATCTAGCCGGAGTTTCTTCAATTCTCGGTGCAGTAA…	CCATGAGGACAAATATCATTTTGAGGAGCAACAGTTATTACAAATCTATTATCCGCCATTCCATATGTAGGTACTATATTAGTCCAATGAGTATGGGGAGGATTTGCTGTAGACAATGCAACCTTAACACGATTCTTTACGTTCCATTTTATTTTACCATTCATTGTAGCCGCAATAGTACTAATCCACCTTCTATTCCTTCACCAAACTGGATCAAATAATCCACTAGGAATAAATAGCAATATTGATAAAATTCCTTTCCACCCATACTTCACATTTAAGGATATTATAGGATTTATCATTTTAATAATAACACTAACACTATTAACACTACTAAATCCATACTATTTAGGTGATCCCGATAATTTTACTCCGGCTAACCCCCTAGTAACCCCAGTT…	MT904234	MT904256
CTB_022	AL	Brian D. Holt, and Evan Lawrence	Dallas, Co., Alabama Island, Gardiner Island	2019-07-02	Female		32.4348	-86.8559
CTB_023	AL	Brian D. Holt, and Evan Lawrence	Dallas, Co., Alabama Island, Gardiner Island	2019-07-03	Male		32.4348	-86.8559	TTCAGGGTGACCAAAAAATCAGAATAGATGTTGATAAAGAATAGGATCCCCCCCGCCTGCCGGGTCAAAGAAGGATGTATTTAGATTACGATCAGTAAGTAACATGGTAATTGCACCTGCTAGTACAGGTAGTGATAATAGTAATAGTAAGGCTGTAATACCGACTGATCATACAAATAAAGGCATTCGGTCGAATGTTATTCCTACCGATCGTATATTAATAATTGTAGTAATAAAATTTACTGCACCGAGAATTGAGGAAACTCCGGCTAGATGCAAGCTAAAAATTGTTAAATCAACTGAAGCCCCTGCATGAGCAATTCCAGCTGATAATGGAGGATAAACAGTTCAGCCTGTTCCAGCCCCATCTCCTACTATTCTACTTATTAATAATAAAGT…				MT904235
CTB_024	AL	Brian D. Holt, and Evan Lawrence	Dallas, Co., Alabama Island, Gardiner Island	2019-07-04	Female		32.4348	-86.8559	CAGGAAACAGCTATGACTAAACTTCAGGGTGACCAAAAAATCAGAATAGATGTTGATAAAGAATAGGATCCCCCCCGCCTGCCGGGTCAAAGAAGGATGTATTTAGATTACGATCAGTAAGTAACATGGTAATTGCACCTGCTAGTACAGGTAGTGATAATAGTAATAGTAAGGCTGTAATACCGACTGATCATACAAATAAAGGCATTCGGTCGAATGTTATTCCTACCGATCGTATATTAATAATTGTAGTAATAAAATTTACTGCACCGAGAATTGAGGAAACTCCGGCTAGATGCAAGCTAAAAATTGTTAAATCAACTGAAGCCCCTGCATGAGCAATTCCAGCTGATAATGGAGGATAAACAGTTCAGCCTGTTCCAGCCCCATCTCCTACTA…				MT904236
CTB_025	ME	R. Gwiazdowski, D. Yorks, E. Stephens	Maine	2019-08-19	Female
CTB_026	ME	R. Gwiazdowski, D. Yorks, E. Stephens	Maine	2019-08-19	Male						ATTCAACCAATCATAAAGATATTGGTACCTTATATTTTATTTTTGGAGCCTGATCAGGAATAGTAGGAACCTCATTAAGTATATTAATTCGAGCAGAATTGGGGAGTCCAGGATCTCTTATTGGAGATGATCAGATTTACAATGTAATTGTAACAGCTCACGCCTTTGTAATAATTTTCTTTATAGTAATGCCTATCATAATTGGAGGATTTGGAAATTGACTAGTACCCTTAATACTGGGAGCTCCAGATATGGCTTTCCCCCGAATAAATAATATAAGTTTCTGACTTCTACCACCATCACTAACCTTATTATTAATAAGTAGAATAGTAGGAGATGGGGCTGGAACAGGCTGAACTGTTTATCCTCCATTATCAGCTGGAATTGCTCATGCAGGGG…	GGAGCAACAGTTATTACAAATCTATTATCCGCCATTCCATATGTAGGTACTATATTAGTCCAATGAGTATGGGGAGGATTTGCTGTAGACAATGCAACCTTAACACGATTCTTTACGTTCCATTTTATTTTACCATTCATTGTAGCCGCAATAGTACTAATCCACCTTCTATTCCTTCACCAAACTGGATCAAATAATCCACTAGGAATAAATAGCAATATTGATAAAATTCCTTTCCACCCATACTTCACATTTAAGGATATTATAGGATTTATCATTTTAATAATAACACTAACACTATTAACACTACTAAACCCATACTATTTAGGTGATCCCGATAATTTTACTCCGGCTAACCCCCTAGTAACCCCAGTTCACATTCAACCCGAATGATACTTT…	MT904237	MT904258
CTB_027	NH	R. Gwiazdowski	Chase Island, Cornish	2019-07-21	Female				CATCACTAACCTTATTATTAATAAGTAGAATAGTAGGAGATGGGGCTGGAACAGGCTGAACTGTTTATCCTCCATTATCAGCTGGAATTGCTCATGCAGGGGCTTCAGTTGATTTAGCAATTTTTAGCTTGCATCTAGCCGGAGTTTCTTCAATTCTCGGTGCAGTAAATTTTATTACTACAATTATTAATATACGATCGGTAGGAATAACATTCGACCGAATGCCTTTATTTGTATGATCAGTCGGTATTACAGCCTTACTATTACTGTTATCACTACCTGTACTAGCAGGTGCAATTACCATGTTACTTACTGATCGTAATCTAAATACATCCTTCTTTGACCCGGCAGGCGGGGGGGATCCTATTCTTTATCAACATCTATTCTGATTTTTTGGTC…				MT904238
CTB_028	NH	R. Gwiazdowski	Chase Island, Cornish	2019-07-21	Male				TTATTATTAATAAGTAGAATAGTAGGAGATGGGGCTGGAACAGGCTGAACTGTTTATCCTCCATTATCAGCTGGAATTGCTCATGCAGGGGCTTCAGTTGATTTAGCAATTTTTAGCTTGCATCTAGCCGGAGTTTCTTCAATTCTCGGTGCAGTAAATTTTATTACTACAATTATTAATATACGATCGGTAGGAATAACATTCGACCGAATGCCTTTATTTGTATGATCAGTCGGTATTACAGCCTTACTATTACTGTTATCACTACCTGTACTAGCAGGTGCAATTACCATGTTACTTACTGATCGTAATCTAAATACATCCTTCTTTGACCCGGCAGGCGGGGGGGATCCTATTCTTTATCAACATCTATTCTGATTTTTTGGTCACCCTGAAGTT…		TCAACCAATCATAAAGATATTGGAACCTTATATTTTATTTTTGGAGCCTGATCAGGAATAGTAGGAACCTCATTAAGTATATTAATTCGAGCAGAATTGGGGAGTCCAGGATCTCTTATTGGAGATGATCAGATTTACAATGTAATTGTAACAGCTCACGCCTTTGTAATAATTTTCTTTATAGTAATGCCTATCATAATTGGAGGATTTGGAAATTGACTAGTACCCTTAATACTGGGAGCTCCAGATATGGCTTTCCCCCGAATAAATAATATAAGTTTCTGACTTCTACCACCATCACTAACCTTATTATTAATAAGTAGAATAGTAGGAGATGGGGCTGGAACAGGCTGAACTGTTTATCCTCCATTATCAGCTGGAATTGCTCATGCAGGGGCT…	GGAGCAACAGTTATTACAAATCTATTATCCGCCATTCCATATGTAGGTACTATATTAGTCCAATGAGTATGGGGAGGATTTGCTGTAGACAATGCAACCTTAACACGATTCTTTACGTTCCATTTTATTTTACCATTCATTGTAGCCGCAATAGTACTAATCCACCTTCTATTCCTTCACCAAACTGGATCAAATAATCCACTAGGAATAAATAGCAATATTGATAAAATTCCTTTCCACCCATACTTCACATTTAAGGATATTATAGGATTTATCATTTTAATAATAACACTAACACTATTAACACTACTAAACCCATACTATTTAGGTGATCCCGATAATTTTACTCCGGCTAACCCCCTAGTAACCCCAGTTCACATTCAACCCGAATGATACTTT…	MT904239	MT904259
CTB_029	VT	R. Gwiazdowski	Windsor	2019-07-21	Female							CAGTTATTACAAATCTATTATCCGCCATTCCATATGTAGGTACTATATTAGTCCAATGAGTATGGGGAGGATTTGCTGTAGACAATGCAACCTTAACACGATTCTTTACGTTCCATTTTATTTTACCATTCATTGTAGCCGCAATAGTACTAATCCACCTTCTATTCCTTCACCAAACTGGATCAAATAATCCACTAGGAATAAATAGCAATATTGATAAAATTCCTTTCCACCCATACTTCACATTTAAGGATATTATAGGATTTATCATTTTAATAATAACACTAACACTATTAACACTACTAAACCCATACTATTTAGGTGATCCCGATAATTTTACTCCGGCTAACCCCCTAGTAACCCCAGTTCACATTCAACCCGAATGATACTTTCTATTTG…		MT904265
CTB_030	VT	R. Gwiazdowski	Windsor	2019-07-21	male				ATGCAGGGGCTTCAGTTGATTTAGCAATTTTTAGCTTGCATCTAGCCGGAGTTTCTTCAATTCTCGGAGCAGTAAATTTTATTACTACTATTATTAATATACGATCGGTAGGAATAACATTCGACCGAATGCCTTTATTTGTATGATCAGTCGGAATTACAGCCTTACTATTACTGTTATCACTACCTGTACTAGCAGGAGCAATTACCATGTTACTTACTGATCGTAATCTAAATACATCCTTCTTTGACCCGGCAGGCGGGGGGGATCCTATTCTTTATCAACATCTATTCTGATTTTTTGGTCACCCTGAAGTTTAGTCATA		AAAGATATTGGAACCTTATATTTTATTTTTGGAGCCTGATCAGGAATAGTAGGAACCTCATTAAGTATATTAATTCGAGCAGAATTGGGGAGTCCAGGATCTCTTATTGGAGATGATCAGATTTACAATGTAATTGTAACAGCTCACGCCTTTGTAATAATTTTCTTTATAGTAATGCCTATCATAATTGGAGGATTTGGAAATTGACTAGTACCCTTAATACTGGGAGCTCCAGATATGGCTTTCCCCCGAATAAATAATATAAGTTTCTGACTTCTACCACCATCACTAACCTTATTATTAATAAGTAGAATAGTAGGAGATGGGGCTGGAACAGGCTGAACTGTTTATCCTCCATTATCAGCTGGAATTGCTCATGCAGGGGCTTCAGTTGATTTA…	GGAGCAACAGTTATTACAAATCTATTATCCGCCATTCCATATGTAGGTACTATATTAGTCCAATGAGTATGGGGAGGATTTGCTGTAGACAATGCAACCTTAACACGATTCTTTACGTTCCATTTTATTTTACCATTCATTGTAGCCGCAATAGTACTAATCCACCTTCTATTCCTTCACCAAACTGGATCAAATAATCCACTAGGAATAAATAGCAATATTGATAAAATTCCTTTCCACCCATACTTCACATTTAAGGATATTATAGGATTTATCATTTTAATAATAACACTAACACTATTAACACTACTAAACCCATACTATTTAGGTGATCCCGATAATTTTACTCCGGCTAACCCCCTAGTAACCCCAGTTCACATTCAACCCGAATGATACTTT…	MT904240	MT904260
CTB_031	AL	R. Stephen Krotzer, G. Beaton	Alabama, Perry Co. Cahaba River	2019-07-05	Male				TTATTAATAAGTAGAATAGTAGGAGATGGGGCTGGAACAGGCTGAACTGTTTATCCTCCATTATCAGCYGGAATTGCTCATGCAGGGGCTTCAGTTGATTTAGCAATTTTTAGCTTGCATCTAGCCGGAGTTTCTTCAATTCTCGGTGCAGTAAATTTTATTACTACAATTATTAATATACGATCGGTAGGAATAACATTCGACCGAATGCCTTTATTTGTATGATCAGTCGGTATTACAGACTTACTATTACTATTATCACTACCTGTACTAGCAGGTGCAATTACCATGCTACTTACTGATCGTAATCTAAATACATCCTTCTTTGAC		AATAGTAGGAACCTCATTAAGTATACTAATTCGAGCAGAATTGGGGAGTCCAGGATCTCTTATTGGAGATGATCAGATTTACAATGTAATTGTAACAGCTCACGCCTTTGTAATAATTTTCTTTATAGTAATGCCTATCATAATTGGAGGATTTGGAAATTGACTAGTACCCTTAATACTGGGAGCTCCAGATATGGCTTTCCCCCGAATAAATAATATAAGTTTCTGACTTCTACCACCATCATTAACTTTATTATTAATAAGTAGAATAGTAGGAGATGGGGCTGGAACAGGCTGAACTGTTTATCCTCCATTATCAGCTGGAATTGCTCATGCAGGGGCTTCAGTTGATTTAACAATTTTTAGCTTGCATCTAGCCGGAGTTTCCTCAATTCTCGG…	GGAGCAACAGTTATTACAAATCTATTATCCGCCATTCCATATGTAGGTACTATATTAGTCCAATGAGTATGGGGAGGATTTGCTGTAGACAATGCAACCTTAACACGATTCTTTACGTTCCATTTTATTTTACCATTCATTGTAACCGCAATAGTACTAATCCACCTTCTATTCCTTCACCAAACTGGATCAAATAATCCACTAGGAATAAATAGCAATATTGATAAAATTCCTTTCCACCCATACTTCACATTTAAGGATATTATAGGATTTATCATTTTAATAATAACACTAACACTATTAACACTACTAAATCCATACTATTTAGGCGATCCCGATAATTTTACTCCGGCTAACCCCCTAGTAACCCCAGTTCACATTCAACCCGAATGATACTTT…	MT904241	MT904252
CTB_032	AL	R. Stephen Krotzer, G. Beaton	Alabama, Perry Co. Cahaba River	2019-07-06	Male				AATAAATAATATAAGTTTCTGACTTCTACCACCATCATTAACTTTATTATTAATAAGTAGAATAGTAGGAGATGGGGCTGGAACAGGCTGAACTGTTTATCCTCCATTATCAGCYGGAATTGCTCATGCAGGGGCTTCAGTTGATTTAACAATTTTTAGCTTGCATCTAGCCGGAGTTTCCTCAATTCTCGGTGCAGTAAATTTTATTACTACAATTATTAATATACGATCGGTAGGAATAACATTCGACCGAATGCCTTTATTTGTATGATCAGTCGGTATTACAGCCTTACTATTACTATTATCACTACCTGTACTAGCAGGTGCAATTACCATGTTACTTACTGATCGTAATCTAAATACATCCTTCTTTGACCCGGCAGGCGGGGGGGATCCTAT…		ATAAAGATATTGGAACCTTATATTTTATTTTTGGAGCCTGATCAGGAATAGTAGGAACCTCATTAAGTATACTAATTCGAGCAGAATTGGGGAGTCCAGGATCTCTTATTGGAGATGATCAGATTTACAATGTAATTGTAACAGCTCACGCCTTTGTAATAATTTTCTTTATAGTAATGCCTATCATAATTGGAGGATTTGGAAATTGACTAGTACCCTTAATACTGGGAGCTCCAGATATGGCTTTCCCCCGAATAAATAATATAAGTTTCTGACTTCTACCACCATCATTAACTTTATTATTAATAAGTAGAATAGTAGGAGATGGGGCTGGAACAGGCTGAACTGTTTATCCTCCATTATCAGCTGGAATTGCTCATGCAGGGGCTTCAGTTGATT…	GGAGCAACAGTTATTACAAATCTATTATCCGCCATTCCATATGTAGGTACTATATTAGTCCAATGAGTATGGGGAGGATTTGCTGTAGACAATGCAACCTTAACACGATTCTTTACGTTCCATTTTATTTTACCATTCATTGTAACCGCAATAGTACTAATCCACCTTCTATTCCTTCACCAAACTGGATCAAATAATCCACTAGGAATAAATAGCAATATTGATAAAATTCCTTTCCACCCATACTTCACATTTAAGGATATTATAGGATTTATCATTTTAATAATAACACTAACACTATTAACACTACTAAATCCATACTATTTAGGCGATCCCGATAATTTTACTCCGGCTAACCCCCTAGTAACCCCAGTTCACATTCAACCCGAATGATACTTT…	MT904242	MT904253
CTB_033	AL	R. Stephen Krotzer, G. Beaton	Alabama, Perry Co. Cahaba River	2019-07-07	Male				AATAAATAATATAAGTTTCTGACTTCTTCCACCATCATTAACTTTATTATTAATAAGTAGAATAGTAGGAGATGGGGCTGGAACAGGCTGAACTGTTTATCCTCCATTATCAGCYGGWATTGCTCATGCAGGAGCTTCAGTTGATTTAACAATTTTTAGYTTGCATCTAGCCGGAGTYTCCTCAATTCTCGGTGCAGTAAATTTTATTACTACAATTATTAATATACGATCRGTAGGAATAACATTCGAYCGAATGCCTTTATTTGTATGATCRGTCGGTATTACAGMCTTACTATTACTATTATCACTACCTGTACTAGCAGGTGCAATTACCATGCTACTTACTGATCGTAATCTAAATACATCCTTCTTTGACCCRGCAGGCG			GGAGCAACAGTTATTACAAATCTATTATCCGCCATTCCATATGTAGGTACTATATTAGTCCAATGAGTATGGGGAGGATTTGCTGTAGACAATGCAACCTTAACACGATTCTTTACGTTCCATTTTATTTTACCATTCATTGTAACCGCAATAGTACTAATCCACCTTCTATTCCTTCACCAAACTGGATCAAATAATCCACTAGGAATAAATAGCAATATTGATAAAATTCCTTTCCACCCATACTTCACATTTAAGGATATTATAGGATTTATCATTTTAATAATAACACTAACACTATTAACACTACTAAATCCATACTATTTAGGCGATCCCGATAATTTTACTCCGGCTAACCCCCTAGTAACCCCAGTTCACATTCAACCCGAATGATACTTT…	MT904243	MT904254
CTB_034	AL	R. Stephen Krotzer, G. Beaton	Alabama, Perry Co. Cahaba River	2019-07-08	Male				CTTTATTATTAATAAGTAGAATAGTAGGAGATGGGGCTGGAACAGGCTGAACTGTTTATCCTCCATTATCAGCYGGAATTGCTCATGCAGGGGCTTCAGTTGATTTARCAATTTTTAGCTTGCATCTAGCCGGAGTTTCCTCAATTCTYGGTGCAGTAAATTTTATTACTACAATTATTAATATACGATCGGTAGGAATAACATTCGACCGAATGCCTTTATTTGTATGATCAGTCGGTATTACAGCCTTACTATTACTATTATCACTACCTGTACTAGCAGGTGCAATTACCATGYTACTTACTGATCGTAATCTAAATACATCCTTCTTTGACCCGGCAGGCGGGGGGGATCCTATTCTTTATCAACATCTATTCTGATTTTTTGGTCACCCTGAAG…			CTATTATCCGCCATTCCATATGTAGGTACTATATTAGTCCAATGAGTATGGGGAGGATTTGCTGTAGACAATGCAACCTTAACACGATTCTTTACGTTCCATTTTATTTTACCATTCATTGTAACCGCAATAGTACTAATCCACCTTCTATTCCTTCACCAAACTGGATCAAATAATCCACTAGGAATAAATAGCAATATTGATAAAATTCCTTTCCACCCATACTTCACATTTAAGGATATTATAGGATTTATCATTTTAATAATAACACTAACACTATTAACACTACTAAATCCATACTATTTAGGCGATCCCGATAATTTTACTCCGGCTAACCCCCTAGTAACCCCAGTTCACATTCAACCCGAATGATACTTTCTATTTGCTTACGCAATTCT	MT904244	MT904255
CTB_035	NH	R. Gwiazdowski, S. von Oettingen	Pemigewasset River, Livermore Falls	2019-09-20	Female				GTTGATAAAGAATAGGATCCCCCCCGCCTGCCGGGTCAAAGAAGGATGTATTTAGATTACGATCAGTAAGTAACATGGTAATTGCACCTGCTAGTACAGGTAGTGATAACAGTAATAGTAAGGCTGTAATACCGACTGATCATACAAATAAAGGCATTCGGTCGAATGTTATTCCTACCGATCGTATATTAATAATTGTAGTAATAAAATTTACTGCACCGAGAATTGAAGAAACTCCGGCTAGATGCAAGCTAAAAATTGCTAAATCAACTGAAGCCCCTGCATGAGCAATTCCAGCTGATAATGGAGGATAAACAGTTCAGCCTGTTCCAGCCCCATCTCCTACTATTCTACTTATTAATAATAAGGTTA				MT904245
CTB_036	NH	R. Gwiazdowski, S. von Oettingen	Pemigewasset River, Livermore Falls	2019-09-20	Female				TAAACTTCAGGGTGACCAAAAAATCAGAATAGATGTTGATAAAGAATAGGATCCCCCCCGCCTGCCGGGTCAAAGAAGGATGTATTTAGATTACGATCAGTAAGTAACATGGTAATTGCACCTGCTAGTACAGGTAGTGATAACAGTAATAGTAAGGCTGTAATACCGACTGATCATACAAATAAAGGCATTCGGTCGAATGTTATTCCTACCGATCGTATATTAATAATTGTAGTAATAAAATTTACTGCACCGAGAATTGAAGAAACTCCGGCTAGATGCAAGCTAAAAATTGCTAAATCAACTGAAGCCCCTGCATGAGCAATTCCAGCTGATAATGGAGGATAAACAGTTCAGCCTGTTCCAGCCCCATCTCCTACTATTCTACTTATTAATAAT…				MT904246
CTB_037	NH	R. Gwiazdowski, S. von Oettingen	Pemigewasset River, Livermore Falls	2019-09-20	Male				AACTTCAGGGTGACCAAAAAATCAGAATAGATGTTGATAAAGAATAGGATCCCCCCCGCCTGCCGGGTCAAAGAAGGATGTATTTAGATTACGATCAGTAAGTAACATGGTAATTGCACCTGCTAGTACAGGTAGTGATAACAGTAATAGTAAGGCTGTAATACCGACTGATCATACAAATAAAGGCATTCGGTCGAATGTTATTCCTACCGATCGTATATTAATAATTGTAGTAATAAAATTTACTGCACCGAGAATTGAAGAAACTCCGGCTAGATGCAAGCTAAAAATTGCTAAATCAACTGAAGCCCCTGCATGAGCAATTCCAGCTGATAATGGAGGATAAACAGTTCAGCCTGTTCCAGCCCCATCTCCTACTATTCTACTTATTAATAATAA…		CATAAAGATATTGGAACCTTATATTTTATTTTTGGAGCCTGATCAGGAATAGTAGGAACCTCATTAAGTATATTAATTCGAGCAGAATTGGGGAGTCCAGGATCTCTTATTGGAGATGATCAGATTTACAATGTAATTGTAACAGCTCACGCCTTTGTAATAATTTTCTTTATAGTAATGCCTATCATAATTGGAGGATTTGGAAATTGACTAGTACCCTTAATACTGGGAGCTCCAGATATGGCTTTCCCCCGAATAAATAATATAAGTTTCTGACTTCTACCACCATCACTAACCTTATTATTAATAAGTAGAATAGTAGGAGATGGGGCTGGAACAGGCTGAACTGTTTATCCTCCATTATCAGCTGGAATTGCTCATGCAGGGGCTTCAGTTGAT…	CTATTATCCGCCATTCCATATGTAGGTACTATATTAGTCCAATGAGTATGGGGAGGATTTGCTGTAGACAATGCAACCTTAACACGATTCTTTACGTTCCATTTTATTTTACCATTCATTGTAGCCGCAATAGTACTAATCCACCTTCTATTCCTTCACCAAACTGGATCAAATAATCCACTAGGAATAAATAGCAATATTGATAAAATTCCTTTCCACCCATACTTCACATTTAAGGATATTATAGGATTTATCATTTTAATAATAACACTAACACTATTAACACTACTAAACCCATACTATTTAGGTGATCCCGATAATTTTACTCCGGCTAACCCCCTAGTAACCCCAGTTCACATTCAACCCGAATGATACTTTCTATTTGCTTACGCAATTCTT…	MT904247	MT904257
CTB_038	NH	R. Gwiazdowski, S. von Oettingen	Pemigewasset River, Livermore Falls	2019-09-20	Female				CCCCCCCGCCTGCCGGGTCAAAGAAGGATGTATTTAGATTACGATCAGTAAGTAACATGGTAATTGCACCTGCTAGTACAGGTAGTGATAACAGTAATAGTAAGGCTGTAATACCGACTGATCATACAAATAAAGGCATTCGGTCGAATGTTATTCCTACCGATCGTATATTAATAATTGTAGTAATAAAATTTACTGCACCGAGAATTGAAGAAACTCCGGCTAGATGCAAGCTAAAAATTGCTAAATCAACTGAAGCCCCTGCATGAGCAATTCCAGCTGATAATGGAGGATAAACAGTTCAGCCTGTTCCAGCCCCATCTCCTACTATTCTACTTAT			ATCCGCCATTCCATATGTAGGTACTATATTAGTCCAATGAGTATGGGGAGGATTTGCTGTAGACAATGCAACCTTAACACGATTCTTTACGTTCCATTTTATTTTACCATTCATTGTAGCCGCAATAGTACTAATCCACCTTCTATTCCTTCACCAAACTGGATCAAATAATCCACTAGGAATAAATAGCAATATTGATAAAATTCCTTTCCACCCATACTTCACATTTAAGGATATTATAGGATTTATCATTTTAATAATAACACTAACACTATTAACACTACTAAACCCATACTATTTAGGTGATCCCGATAATTTTACTCCGGCTAACCCCCTAGTAACCCCAGTTCACATTCAACCCGAATGATACTTTCTATTTGCTTACGCAATTCTTCGATC…	MT904248	MT904266
CTB_039	ME	R. Gwiazdowski, D. Yorks, E. Stephens	Maine	2019-08-19	Male				TAAACTTCAGGGTGACCAAAAAATCAGAATAGATGTTGATAAAGAATAGGATCCCCCCCGCCTGCCGGGTCAAAGAAGGATGTATTTAGATTACGATCAGTAAGTAACATGGTAATTGCACCTGCTAGTACAGGTAGTGATAACAGTAATAGTAGGGCTGTAATACCGACTGATCATACAAATAAAGGCATTCGGTCGAATGTTATTCCTACCGATCGTATATTAATAATTGTAGTAATAAAATTTACTGCACCGAGAATTGAAGAAACTCCGGCTAGATGCAAGCTAAAAATTGCTAAATCAACTGAAGCCCCTGCATGAGCAATTCCAGCTGATAATGGAGGATAAACAGTTCAGCCTGTTCCAGCCCCATCTCCTACTATTCTACTTATTAATAAT…		CATAAAGATATTGGAACCTTATATTTTATTTTTGGAGCCTGATCAGGAATAGTGGGAACCTCATTAAGTATATTAATTCGAGCAGAATTGGGGAGTCCAGGATCTCTTATTGGAGATGATCAGATTTACAATGTAATTGTAACAGCTCACGCCTTTGTAATAATTTTCTTTATAGTAATGCCTATCATAATTGGAGGATTTGGAAATTGACTAGTACCCTTAATACTGGGAGCTCCAGATATGGCTTTCCCCCGAATAAATAATATAAGTTTCTGACTTCTACCACCATCACTAACCTTATTATTAATAAGTAGAATAGTAGGAGATGGGGCTGGAACAGGCTGAACTGTTTATCCTCCATTATCAGCTGGAATTGCTCATGCAGGGGCTTCAGTTGAT…	TTTTGAGGAGCAACAGTTATTACAAATCTATTATCCGCCATTCCATATGTAGGTACTATATTAGTCCAATGAGTATGGGGAGGATTTGCTGTAGACAATGCAACCTTAACACGATTCTTTACGTTCCATTTTATTTTACCATTCATTGTAGCCGCAATAGTACTAATCCACCTTCTATTCCTTCACCAAACTGGATCAAATAATCCACTAGGAATAAATAGCAATATTGATAAAATTCCTTTCCACCCATACTTCACATTTAAGGATATTATAGGATTTATCATTTTAATAATAACACTAACACTATTAACACTACTAAACCCATACTATTTAGGTGATCCCGATAATTTTACTCCGGCTAACCCCCTAGTAACCCCAGTTCACATTCAACCCGAATGA…	MT904249	MT904261
CTB_040	ME	R. Gwiazdowski, D. Yorks, E. Stephens	Maine	2019-08-19	Male				TAAACTTCAGGGTGACCAAAAAATCAGAATAGATGTTGATAAAGAATAGGATCCCCCCCGCCTGCCGGGTCAAAGAAGGATGTATTTAGATTACGATCAGTAAGTAACATGGTAATTGCACCTGCTAGTACAGGTAGTGATAACAGTAATAGTAGGGCTGTAATACCGACTGATCATACAAATAAAGGCATTCGGTCGAATGTTATTCCTACCGATCGTATATTAATAATTGTAGTAATAAAATTTACTGCACCGAGAATTGAAGAAACTCCGGCTAGATGCAAGCTAAAAATTGCTAAATCAACTGAAGCCCCTGCATGAGCAATTCCAGCTGATAATGGAGGATAAACAGTTCAGCCTGTTCCAGCCCCATCTCCTACTATTCTACTTATTAATAAT…		TTTTGGAGCCTGATCAGGAATAGTGGGAACCTCATTAAGTATATTAATTCGAGCAGAATTGGGGAGTCCAGGATCTCTTATTGGAGATGATCAGATTTACAATGTAATTGTAACAGCTCACGCCTTTGTAATAATTTTCTTTATAGTAATGCCTATCATAATTGGAGGATTTGGAAATTGACTAGTACCCTTAATACTGGGAGCTCCAGATATGGCTTTCCCCCGAATAAATAATATAAGTTTCTGACTTCTACCACCATCACTAACCTTATTATTAATAAGTAGAATAGTAGGAGATGGGGCTGGAACAGGCTGAACTGTTTATCCTCCATTATCAGCTGGAATTGCTCATGCAGGGGCTTCAGTTGATTTAGCAATTTTTAGCTTGCATCTAGCCGG…		MT904250
CTB_041	ME	R. Gwiazdowski, D. Yorks, E. Stephens	Maine	2019-08-19	Female				TGTTGATAAAGAATAGGATCCCCCCCGCCTGCCGGGTCAAAGAAGGATGTATTTAGATTACGATCAGTAAGTAACATGGTAATTGCACCTGCTAGTACAGGTAGTGATAACAGTAATAGTAAGGCTGTAATACCGACTGATCATACAAATAAAGGCATTCGGTCGAATGTTATTCCTACCGATCGTATATTAATAATTGTAGTAATAAAATTTACTGCACCGAGAATTGAAGAAACTCCGGCTAGATGCAAGCTAAAAATTGCTAAATCAACTGAAGCCCCTGCATGAGCAATTCCAGCTGATAATGGAGGATAAACAGTTCAGCCTGTTCCAGCCCCATCTCCTACTATTCTACTTATTAATAATAAGGTTAG			CCATGAGGACAAATATCGTTTTGAGGAGCAACAGTTATTACAAATCTATTATCCGCCATTCCATATGTAGGTACTATATTAGTCCAATGAGTATGGGGAGGATTTGCTGTAGACAATGCAACCTTAACACGATTCTTTACGTTCCATTTTATTTTACCATTCATTGTAGCCGCAATAGTACTAATCCACCTTCTATTCCTTCACCAAACTGGATCAAATAATCCACTAGGAATAAATAGCAATATTGATAAAATTCCTTTCCACCCATACTTCACATTTAAGGATATTATAGGATTTATCATTTTAATAATAACACTAACACTATTAACACTACTAAACCCATACTATTTAGGTGATCCCGATAATTTTACTCCGGCTAACCCCCTAGTAACCCCAGTT…	MT904251	MT904262
NEONTcarabid4152_Cicindela_marginipennis_United_States_Alabama	AL	J. Schmidt, J. Owens	Alabama, Perry Co. Cahaba River	2005-06-26					CTTTCCCCCGAATAAATAATATAAGTTTCTGACTTCTACCACCATCATTAACTTTATTATTAATAAGTAGAATAGTAGGAGATGGGGCTGGAACAGGCTGAACTGTTTATCCTCCATTATCAGCTGGAATTGCTCATGCAGGGGCTTCAGTTGATTTAACAATTTTTAGCTTGCATCTAGCCGGAGTTTCCTCAATTCTCGGTGCAGTAAATTTTATTACTACAATTATTAATATACGATCGGTAGGAATAACATTCGACCGAATGCCTTTATTTGTATGATCAGTCGGTATTACAGCCTTACTATTACTATTATCACTACCTGTACTAGCAGGTGCAATTACCATGTTACTTACTGATCGTAATCTAAATACATCCTTCTTTGACCCGGCAGGCGGGG…
X CTB_003		Accession number not used
X CTB_007		Accession number not used
X CTB_011		Accession number not used
X CTB_012		Accession number not used
